# Supplementary material
Source: PubMed Central journal article supplement (PMC4678659)

*a*

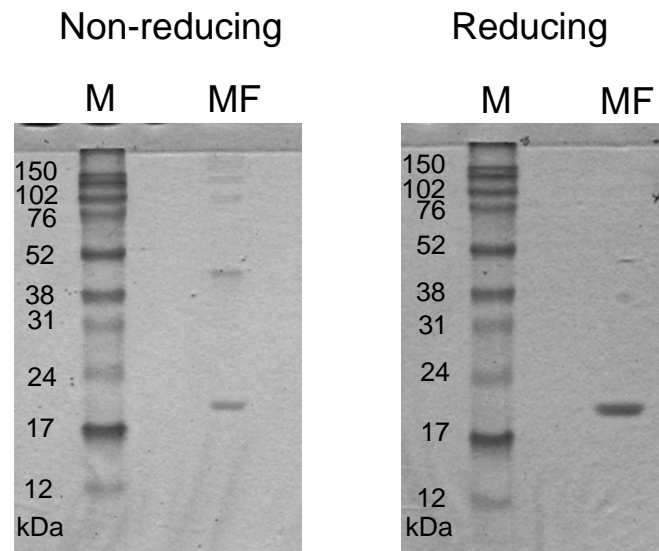

*b*

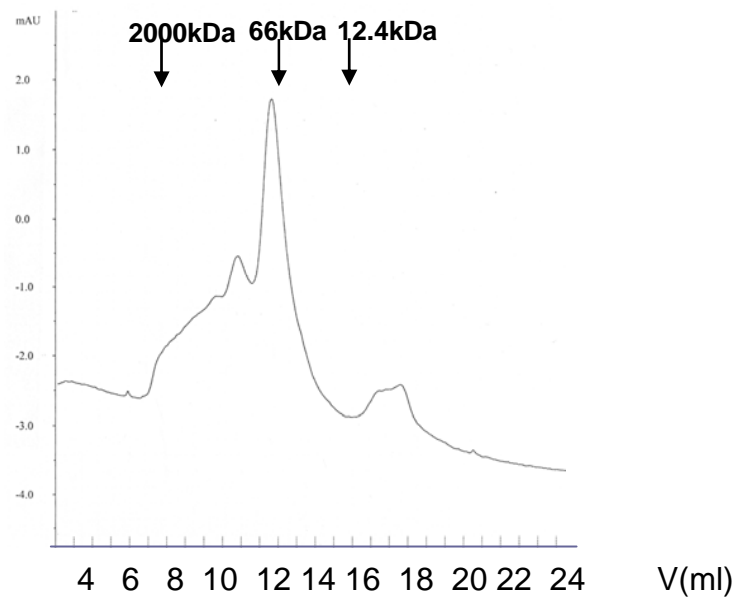

Figure S2

Supplement: NIHMS65108-supplement-Figure_S2.pdf [file NIHMS65108-supplement-Figure_S2.pdf]
